# Supplementary material for: Epigenetic Regulation of miR-25 and Lnc107153 on Expression of Seasonal Estrus Key Gene CHGA in Sheep
Source: MDPI journal article supplement (doi:10.3390/biology12020250), 2023-02-04
Supplement: s1 [file s1]

Table S2 Sequence information of wild type and mutant type 3'UTR of *CHGA* and Lnc107153

| Name of vectors        | Sequence of the inserted 3'UTR                                                                                                                                                                                                                                                                |
|------------------------|-----------------------------------------------------------------------------------------------------------------------------------------------------------------------------------------------------------------------------------------------------------------------------------------------|
| <i>CHGA</i> 3'UTR -WT  | <b>GCTAGCCCCTGCCCCAGTGCGTCCCGCTGCAGGGCAGACCCCTTGCCTTTCAACGATTATCCTGTCT</b><br>CTGAACACAGGCAGCCTTCTCAAAGTTTCCTAGAACCACTGGGCCTAACT <b><u>TGCAAT</u></b> AAGTACTGACC<br>TTTAGGTGAAAGCTGAGGACTCCTGACTATATTGTGTATGACATTTATCTAAGGGAAATAAATCTG<br>CTCTGGGCTCTTTCC <b><u>CTCGAG</u></b>               |
| <i>CHGA</i> 3'UTR -MUT | <b>GCTAGCCCCTGCCCCAGTGCGTCCCGCTGCAGGGCAGACCCCTTGCCTTTCAACGATTATCCTGTCT</b><br>CTGAACACAGGCAGCCTTCTCAAAGTTTCCTAGAACCACTGGGCCTAACT <b><u>CATCGG</u></b> AAGTACTGACC<br>TTTAGGTGAAAGCTGAGGACTCCTGACTATATTGTGTATGACATTTATCTAAGGGAAATAAATCTG<br>CTCTGGGCTCTTTCC <b><u>CTCGAG</u></b>               |
| Lnc107153-WT           | <b>GCTAGCAGCCACTGACTGTGTGGTTTCTCTGTTATTCTAGTAGTTTAACCAATATGTAACCTTTATTT</b><br>ATCATGCTGATTTCTCATTTCTAC <b><u>TGCAAT</u></b> CCAGTTCAGTTAGGGGTCTAAACAAGGAGCTCTGTTT<br>CATGCAGTCATCTTGTGATCAAGGATTGGTCTCTCTGAAACCCAAAATATCATATAAGACAATGCT<br>ACTGAATGCCCTGGATCCAGTCGGTGA <b><u>ACTCGAG</u></b> |
| Lnc107153-MUT          | <b>GCTAGCAGCCACTGACTGTGTGGTTTCTCTGTTATTCTAGTAGTTTAACCAATATGTAACCTTTATTT</b><br>ATCATGCTGATTTCTCATTTCTAC <b><u>GATCGG</u></b> CCAGTTCAGTTAGGGGTCTAAACAAGGAGCTCTGTTT<br>CATGCAGTCATCTTGTGATCAAGGATTGGTCTCTCTGAAACCCAAAATATCATATAAGACAATGCT<br>ACTGAATGCCCTGGATCCAGTCGGTGA <b><u>ACTCGAG</u></b> |

The 5'NheI was shown by thickening, the 3'XhoI was shown by underlining, and the mutated bases were shown by thickening underlining.
