# Supplementary material for: Epigenetic Regulation of miR-25 and Lnc107153 on Expression of Seasonal Estrus Key Gene CHGA in Sheep
Source: MDPI journal article supplement (doi:10.3390/biology12020250), 2023-02-04
Supplement: s1 [file s1]

Table S4 Pearson correlation coefficient of expression pattern of LncRNA-miRNA-mRNA

|           | CHGA    | miR-25   | Lnc20518 | Lnc107153 | Lnc72519 |
|-----------|---------|----------|----------|-----------|----------|
| CHGA      | 1       | -0.893*  | -0.915*  | 0.889*    | -0.789   |
| miR-25    | -0.893* | 1        | 0.987**  | -0.991**  | 0.974**  |
| Lnc20518  | -0.915* | 0.987**  | -        | -         | -        |
| Lnc107153 | 0.889*  | -0.991** | -        | -         | -        |
| Lnc72519  | -0.789  | 0.974**  | -        | -         | -        |

\* $P < 0.05$ , \*\*  $P < 0.01$ .
