# Supplementary material for: Epigenetic Regulation of miR-25 and Lnc107153 on Expression of Seasonal Estrus Key Gene CHGA in Sheep
Source: MDPI journal article supplement (doi:10.3390/biology12020250), 2023-02-04
Supplement: s1 [file s1]

Table S1 qPCR procedure for miRNAs in this study

| Program Name                   | Condition   | Cycles |
|--------------------------------|-------------|--------|
| Pre-incubation                 | 95°C 15 min | 1      |
| Low abundance miRNA enrichment | 94°C 20 s   | 5      |
|                                | 64°C 30 s   |        |
|                                | 72°C 134s   |        |
| Amplification                  | 94°C 20 s   | 40     |
|                                | 64°C 34 s   |        |
|                                | 95°C 5 s    |        |
| Melting curve                  | 65°C 1 min  | 1      |
|                                | 97°C 5 s    |        |
| Cooling                        | 4°C30 s     | -      |
