# Supplementary material for: Epigenetic Regulation of miR-25 and Lnc107153 on Expression of Seasonal Estrus Key Gene CHGA in Sheep
Source: MDPI journal article supplement (doi:10.3390/biology12020250), 2023-02-04
Supplement: s1 [file s1]

Table S3 Sequence information of Lnc107153 in sheep PT

| LncRNA    | Sequence                                                                                                                                                                                                                                                                                                                                                                                                                                                                                                                                                                                                                                                                                                                                                                                                                                                                                                                                                                                                                                                                                                                                                                                                                                                                                                                                                                                                                                                                                                                                                                                                                                                                                                                                                                                                                              |
|-----------|---------------------------------------------------------------------------------------------------------------------------------------------------------------------------------------------------------------------------------------------------------------------------------------------------------------------------------------------------------------------------------------------------------------------------------------------------------------------------------------------------------------------------------------------------------------------------------------------------------------------------------------------------------------------------------------------------------------------------------------------------------------------------------------------------------------------------------------------------------------------------------------------------------------------------------------------------------------------------------------------------------------------------------------------------------------------------------------------------------------------------------------------------------------------------------------------------------------------------------------------------------------------------------------------------------------------------------------------------------------------------------------------------------------------------------------------------------------------------------------------------------------------------------------------------------------------------------------------------------------------------------------------------------------------------------------------------------------------------------------------------------------------------------------------------------------------------------------|
| Lnc107153 | TTATCCCCATTGTGTTTCATGTTTCTCTTTAAATCTTTAAGT<br>ATTTCCATACCAGATTGTTTTACCTTTTTTGCTAATTCATT<br>TATGAAATTGTATGTGTCTGTTGACTAATACTTTTCTTGC<br>ATGTGAGTCAAATTTTCTCTCTTCTCATGTCTGTTGAAAC<br>ATTTTTAAATTGATTGATAAAAACCATTGAGAGAGATTTG<br>TTGGATACTTTTGAGAAGTATTGAATTTTGTTTTGACATT<br>AATTTACTGTAAATCAGTTTTGCATTTTAGAGGTTTTTTTT<br>TTAACTTTATTTGAGTATTTATAGGTTAGAATTTATTTTCAT<br>TATCTTTCTAAGATATCTTGTTTCTGGGGTCTATTAAGGTC<br>TCCAGTCTGGTTTTTTCAGTTAGGTCTCTCCAGTCCACAAA<br>ACTTCTTTGTGTAGTTTTAGTCTATGCATTGGACCAAAGC<br>CCCCACCACCCTATTCAGATTACTATAGCTCTTTCTCAA<br>CATCTTTCTCGACTTTTTTGGTACTCTCTCCTACAAATTCCA<br>ACTGCCAAGCTTTTTTTGAATTTACAAGCTTTATCTTTAAT<br>TCATTGTGACCTTTCAATTCCTCTCTTCATCATCAATATCA<br>ACCAAATGCTTGATGGCTGAGGCATTAAATGTATGCTAA<br>GTCACGTCAGTCATATCTGACTCTGTGTGACTCTGTGAAC<br>TGTAGCCTCCCAGGCTCCACTGCCCATGTGATTCTCCAGG<br>CAAGAATACTGGAGTGGGTGCCATGCCCTTCTCCAGGA<br>AACTTTCCAACCCAGGGATCGAACCCACATCTCTTTTGTG<br>TCCTGCATTGGCAGGTGGGTCCTTCACCACTAGCATCACC<br>TGGGAAGCCCAAGGCATTATATAGCTCATCCTTTTTTTTT<br>TCTTTTTGTCTTATTTTCAGGGATTACAGTCATCTGCTGCTG<br>ATTTTCAGTATTTGATAACTGTTGTGTTATTTATTCTATTT<br>ATCTAAGGCAGAGGACTTAGCTCTTACTAAGTTTCATCAG<br>GATCTTCTATCTTATAAAAATCATTTTAAAGCATGAGAGA<br>TTGTATTAGTTAAAGGCAAGTTTCCCATGATCCTCATTTG<br>TAACAATTCTGGAAGTTAGTGGATATGATTAATGTGGGC<br>ATCATCAAGAAAATACCAAATAAATTTAGAAATTACAAG<br>TAATTCCAAGTAATTTTCATCTTTATTCTCAGAGTTCAGTA<br>CTTAATTCTGCTAAAAACCATGGCAGGTAAGTCTCAGTAGTAT<br>GTAAAGAAAGGAGAATGACCCCCCAAATGGTTTTTCTT<br>GGTATAATATTTCTCTTTCTATATCAACTACTCAAGGACA<br>AAAATCTTATATTTAATTGCTTAAAACCATAGATAAACAG<br>ATTAATTTTGTCACTATATGTGAGTTGCTCTCTACCAAAT<br>AACCCTCTTTAGTTTTTCTGTAATAATAAAAGATCACTTTT<br>AACAAGCCTAAGGCAACCTACCAAAACCTATCTTTCCAC<br>TTCCCTTTGAAGCTAAATGTTTCCCTGTAACAAAGGTTTG<br>GCCAATAGAGTGTGAGGGTAATAATGCATTTAATACCT<br>GAATTGTGATCATAAGAGAAAAGATATGTGCCTTCCCTTC |

---

CTTTTTTCCTGTTTCTTTCTCTCTCTCTTCTTCTTCTTCTTTT  
TTTTTTTTTTTTGAATATGGGTCTGATGGTGGTAGCTGGAG  
GATCTATTTTTAATTCTGAGAAAGAAAGTTATGCTTTAAA  
GTTAGCAGAATAATAAAAATAGAAGGTGCCTGAGGATGG  
AGGGCTGAAAGTGGCCTCACAGAAGCTATGCACATCCTA  
ATCCTTGGAACATGTGAATGCTACGTTATATGGCAAAGG  
CAACCTGCATATATGATTAAGGTTCTCAAGATAAGGATA  
TGATTCTGGTAGGCTCTAAGTGTAATTATCCGGGTCCCCA  
AATAGGAGAAGCAAGAAAGTCAAAGAAGAAATTGGGAG  
ATGTGATGACAAAAACAAGAAGTTGGAGTGATTTGAAGA  
ATTAGTAATAGACCAAGGATTGTAGGTAACCCAAGAAGA  
TAGAAATTCCAAGGATGTGGAGTTTCCTCTAGAGTCTCCA  
AAATGAACCAACCCTGCTGGCACCTTAGTAAAACTTAGT  
TTTGATTTCTGGCCTTCAGAAATGTAAGGAAATAAATTTA  
GGTTGCTTAATATGTTACAGCAGGAATAAGAAACAAATG  
CATTGGGTGTGCAATGAGAACAAGTTCCTCAATCATTATC  
TGGCTGCCTACAAGTCTAATATCTTGTTTTAGACAAGGTA  
TTTGGTTCTGTGTTAAAATAGCTTAATCCATAGCCATACT  
ATGAAGCCACGATACCACTTTATGATGACATATCAGGAT  
GTATATCTTACTTAAGCCACTGACTGTGTGGTTTCTCTGTT  
ATTCTAGTAGTTTAACCAATATGTAACCTTTATTTATCATG  
CTGATTTCTCATTTCTACTGCAATCCAGTTCAGTTAGGGG  
TCTAAACAAGGAGCTCTGTTTCATGCAGTCATCTTGTGAT  
CAAGGATTGGTCTCTCTGAAACCCAAAATATCATATAAG  
ACAATGCTACTGAATGCCCTGGATCCAGTCGGTGAACCTG  
TTTGTTACCTGGGCCTGGTTATGAGATAAAATACAGCAA  
GTATGAGTAAGCTTCAGCATTTGTATAGTTAGTTCATATT  
GCACCATGACCTATAAAAAGAGATCTTATCTGAGTAACTG  
TAAAAATTGAAGGGGAGGGGGTGGATATCTCCACACTGC  
AAATAGAATCGTTTTCTCAAGCACTGGAGAGACCACAT  
GTGAAGGACTGTGTAGGAGATTTTTTAAGAGTAGGACTT  
GTGGTATCAGATAGTGTTTTGCCTGCTTAGCAAGACACAT  
AATTAGTGTGTTTGACATAAAGAAATCTGAGAAAAGTAA  
AGGAGCTTTGGCTCAAAAAGAAGAAAGGATATATTTTCAT  
GTACATTAAGCCTGGTTTTGCCACAAGAGCCCAGTGTTCA  
TAACTTTCTGGGAGAAAGATCAGTCCATGCAGCCTGAT  
AGCGCTCTCAGAAAGCAGATAAGACAATCATATTTCCGC  
CAAGATGGAATTACTTGCATTTGTGAAAGTAGGTCCCTA  
GAGATTACACCAAACCCCATGCTGTTTTAGCTGGCATAT  
ATCTTCTCCCTGATTCTGAAACAGAAAATGAGATTAACGT  
TTCTACAGCCAGTGCTTTTGGGGCTGCTACAAAGCTAAAC  
TTCCCGTGAACCTCCACAATATTTTCATACCCTCAGTCTGAA  
AGTTTCTAGATCCTGTGCTCTATTAATTTCTGCTACATTTC  
CTCTTGTTTCTAATACTGTCTTGCTCTTAACTGTTCCATTC

---

---

TTTCTCTCAGAAAGAATAAGCCACTTCATCTGGCTTTTTC  
GTTTTGTAAGGCAGTGTGGCAGAAACAAGGGTCTTCCTTC  
TCTTTTATTGCTCTCTGCTTTTCTGGTCCACACATATTTGTT  
CCCATGGATTTCTTATATGTAGTCTTATGGATTTGTCACA  
GTGAGAGATTTGAAAATATTGCATCTAGATCTGCCAAAA  
GCATGTATAGTTCAAGCAAAAGTTTTCCATGCTTTCCTTA  
CTGATTTGAGTAATCCCACCCAGGGGCAGTTCTTCCATTA  
GAATGATATCTAACCTACTCCCAGACATGATCCATCATT  
TCTTGCCTAGAGTCCTTTGGGTATGTTTCACCTTGGCTGT  
GTTTTCACTCAGAGTCCTGATTCCAAACACTGCCAGATCA  
TGAGTCCTTAGGCGCAGAGGACAACCTTCATGACCACCTG  
CAATAGCTGTCGCTTTAGAATACATCCCTGGATGCCAGG  
GGAAAGTTTTACTGTCCATCTGTCTTTCTAATGTATTTTAC  
ACAGTTTGTGCAAACACTTGATAGGAATTTATGGGCTGCT  
ATTCTTACACTTGAGTAACCATAACTAAAATTATTATTCC  
TATTTTGTGTATATCTAACTTCACATTTATGAGTTAAGTC  
GCACCCTTCCTCTGCTTAAAATTCTAAAATGACTTCTAAT  
GTCACTCAAATTAAGCCAGTCTCTTGAAAGCCCATCA  
AAACCATAAGTTTTCTGATTTTGTAGTATCTTCCTATCCTG  
TTCGCCTCTCTCTTGCAAACCTCCACTCTATCTGCTCTTAGT  
GTCCACTGCTTTTCTTTTCTTTAGTATAACCAGTTTGCAGG  
CATCTATTCCCTAAACCTGAAGATATTTAGCCAAATGCCA  
ACAAGGCTCAGTTTCAACCACTTTAAACTGTTCAAGTTAAA  
TGTCTTTTCTCAACAAAGACTTATCCAAATTATACAGTT  
TAAGATTAGGACTAATCCCCATCTTCCCACAGTCTTGGTC  
CCTCTTGATTTTATTTATGGATAGTGCTATTACTTTCTAAT  
AAGATGTATATAGCCTAGAAAAGTATTAACATTATTTCTC  
CATTATGTCAACATCTTTGAAATAGTGATACATTCTATAT  
ATAAAAATGGGTATAAAAACAAAGTGTCTATCAACTAGC  
AATGTTTCCTTCTTCGTTCAAGTTCAGTTCAGTTCAGTTCAG  
TCACTCAGTCGTGTCTACTCTTTGCGACCCCATGAATCG  
CAGCACGCCAGGACTCCCTGTCCATCAGCAACTCTTGGA  
GTTCACTCAGACACACATCCATCAAGTCCATGATGCCATC  
CAGCCATCTCATCCTCTGTCGTCCCCTTCTCCTCCTGCCCC  
CAATCCCTCCCAGCATCAGAGTCTTTTCCAATGAGTCAAC  
TCTTCACATGAGGTGGCCAAAGTACTGGAGTTTCAGCTTT  
AGCATCATTCTTCCAAAGACATCCCAGGGCTGATCTCCT  
TCAGAATGGACTGGTTGGATCTCCTTGCAGTCCAAGGGA  
CTTTCAAGAGTCTTCTCCAACACCACAGTTCAAAAGCATC  
AATTCTTCGGCATTCAAACCTTCTTACAGAGACATAAATA  
GTAGCATCTTAAATTTAATTAAATAAGGTCAATTTTACCT  
AATAAGTTTATAGTTCAGTTTGGGCCTTC

---
